# 1                    **Dilution-based Evaluation of Airborne Infection Risk -** 2                    **Thorough Expansion of Wells-Riley Model**

## 3                    **Running Head: Thorough Expansion of Wells-Riley Model**

4                    Sheng Zhang\*, Zhang Lin\*  
5                    (Division of Building Science and Technology, City University of Hong Kong, Hong  
6                    Kong, China

7                    \*Corresponding author. E-mail: shezhang@cityu.edu.hk (Sheng Zhang);  
8                    bsjzl@cityu.edu.hk (Zhang Lin))

### 9                    **Abstract**

10                    Evaluation of airborne infection risk with spatial and temporal resolutions is  
11                    indispensable for the design of proper interventions fighting infectious respiratory  
12                    diseases (*e.g.*, COVID-19), because the distribution of aerosol contagions is both  
13                    spatially and temporally non-uniform. However, the well-recognized Wells-Riley  
14                    model and modified Wells-Riley model (*i.e.*, the rebreathed-fraction model) are limited  
15                    to the well-mixed condition and unable to evaluate airborne infection risk spatially and  
16                    temporally, which could result in overestimation or underestimation of airborne  
17                    infection risk. This study proposes a dilution-based evaluation method for airborne  
18                    infection risk. The method proposed is benchmarked by the Wells-Riley model and  
19                    modified Wells-Riley model, which indicates that the method proposed is a thorough  
20                    expansion of the Wells-Riley model for evaluation of airborne infection risk with both  
21                    spatial and temporal resolutions. Experiments in a mock hospital ward also demonstrate  
22                    that the method proposed effectively evaluates the airborne infection risk both spatially  
23                    and temporally.

24                    **Keywords:** Infectious respiratory disease; Airborne infection risk; Dilution; Spatial  
25                    and temporal; Wells-Riley model

26

# 1. Introduction

Infectious respiratory diseases (*e.g.*, tuberculosis, influenza, and aspergillosis) are severe threats to people's health and economic development [1]. Particularly, the global pandemic of COVID-19 results in substantial loss of human lives and jeopardizes human development (social, economic, *etc.*). Airborne infection due to the inhalation of pathogen-laden aerosols is one major transmission pathway of infectious respiratory diseases [2]. Infectors' coughing, sneezing, talking, and breathing generate tens of thousands of infectious droplets, and most of the generated infectious droplets evaporate into the air as infectious droplet nuclei [3, 4]. A COVID-19 infector can yield infectious droplets with 100,000 virions every minute of speaking [4, 5]. The airborne transmission of the infectious droplet nuclei can occur over a long distance, causing cross infections. For example, Yu et al. [6] found that SARS airborne infections occurred between different rooms and between adjacent buildings. Liu et al. [7] measured the concentration of airborne COVID-19 RNA in isolation wards and ventilated patient rooms, and suggested that COVID-19 could be transmitted via aerosols. More and more evidence reveals the airborne infection risk of COVID-19 [8, 9].

Evaluation of airborne infection risk should take into account the spatially and temporally non-uniform distribution of pathogen-laden aerosols [1]. The spread of pathogen-laden aerosols is significantly affected by the complicated and transient interactions among the respiratory flows and thermal plumes of occupants, and ventilation flow, which results in the spatially and temporally non-uniform distribution of pathogen-laden aerosols [10]. Since occupants generally spend more than 90% time conducting indoor activities, indoor ventilation is one of the most effective engineering solutions for reducing airborne transmission by diluting the pathogen-laden aerosols with pathogen-free air [11, 12]. Airflow patterns of advanced ventilation with non-uniform aerosol distribution can more effectively reduce airborne transmission risk. For example, displacement ventilation and stratum ventilation target diluting the airborne contaminants in the breathing zone rather than the entire room, thus improve the contaminant removal efficiency of the breathing zone by up to 50% [13].

However, it is challenging to evaluate the airborne infection risk with spatial and temporal resolutions in practice. The dose-response model and Wells-Riley model are two methods for quantitative evaluation of the airborne infection risk [14]. Since the dose-response model requires the information which is costly to obtain during experimental and on-site studies, *e.g.*, the particle sizes and infectivity (involving medical and microbiological sciences), the dose-response model is less frequently used than the Wells-Riley model [1, 10, 15]. The Wells-Riley model is a simple and quick evaluation method of the airborne infection risk, because it uses the concept of quantum to implicitly consider the infectivity, infectious source strength, biological decay of pathogens, *etc.* [14]. As a result, the Wells-Riley model has been widely used in the studies of infectious respiratory diseases [1, 10, 15]. However, the Wells-Riley model is based on the well-mixed and steady assumption that the distribution of pathogen-laden aerosols is spatially and temporally uniform. With this assumption, the airborne infection risk could be underestimated by the Wells-Riley model, and the interventions for reducing airborne infection risk suggested by the Wells-Riley model could be improper [1, 10, 16]. For example, the Wells-Riley model suggests a larger ventilation rate. However, increasing the ventilate rate might deteriorate indoor air quality due to the potential negative effects of the increased ventilation rate on the contaminant removal efficiency of non-uniform airflow pattern [17].

Rudnick and Milton [18] proposed the concept of rebreathed fraction, and used it to modify the Wells-Riley model for the transient condition. The rebreathed fraction is calculated from the difference between indoor and outdoor CO<sub>2</sub> concentrations [18]. The rebreathed-fraction model has been well recognized for the airborne infection risk with a temporal resolution [10, 19, 20]. However, the rebreathed-fraction model is also based on the well-mixed assumption, and thus cannot evaluate the airborne infection risk spatially [18]. Numerical simulations (*e.g.*, computational fluid dynamics) have been used to provide the spatial quantum concentration of airborne pathogens for the Wells-Riley model to evaluate the airborne infection risk spatially [21, 22]. However, this method is inapplicable to physical experiments because it is impossible to measure the quantum concentration of airborne pathogens for experimental and on-site studies [1, 10, 18]. Although numerical simulations are powerful in epidemical studies,

1 physical experiments are indispensable for reliable results [10]. Thus, there is an urgent  
2 need for an evaluation method of airborne infection risk with spatial and temporal  
3 resolutions for practical applications.

4 This study will provide a dilution-based evaluation method of the airborne infection  
5 risk for both spatial and temporal resolutions. The proposed model is illustrated in  
6 Section 2, and benchmarked by the Wells-Riley model under the well-mixed and steady  
7 condition in Section 3, and by the rebreathed-fraction model under the well-mixed and  
8 transient condition in Section 4. Experiments of a mock hospital ward served by  
9 displacement ventilation are conducted in Section 5 to demonstrate the applicability of  
10 the method proposed to evaluate airborne infection risk spatially and temporally.

## 11 **2. Dilution-based airborne infection risk estimation proposed**

12 The concept of dilution is diluting the airborne contaminants with clean air so that the  
13 concentration of airborne contaminants is reduced. Dilution is the mechanism of  
14 ventilation in reducing airborne infection risk [1]. According to the concept of dilution,  
15 the dilution ratio is defined as the ratio between the source concentration to the  
16 contaminant concentration at the target position (Equation 1). The dilution ratio can  
17 vary among different positions relative to the contaminant source transiently. With the  
18 dilution ratio, the quantum concentration of airborne pathogens at the target position is  
19 calculated with Equation 2, which is the quantum concentration exhaled by the infector  
20 diluted at the target position. The quantum is an infectious dose unit [23], and one  
21 quantum is the quantity of pathogens required to cause an infection risk of 63.2% (*i.e.*,  
22  $1-e^{-1}$ ) [19]. For example, the quantum generate rate of a Tuberculosis infector as  
23 suggested by Andrews et al. [24] is 1.25 quanta/h, and that of an asymptomatic infector  
24 COVID-19 is 142 quanta/h [25]. It is noted that the factor of infectious virus removal  
25 in Equation 2 ( $\phi$ ) is used to account for the effects of interventions in reducing the  
26 airborne infection risk except ventilation [14], *e.g.*, facial masks [26, 27] and air  
27 purifiers [28] recommended for controlling COVID-19.

$$28 \quad D = \frac{C_{\text{source}}}{C_{\text{target}}} \quad (1)$$

$$C_{\text{quantum}} = \frac{\varphi q}{p_{\text{infector}} D} \quad (2)$$

where  $C_{\text{source}}$  and  $C_{\text{target}}$  are the airborne contaminant concentrations at the source and target position respectively (ppm);  $C_{\text{quantum}}$  is the airborne quantum concentration at the target position (quanta/m<sup>3</sup>);  $D$  is the dilution ratio at the target position;  $p_{\text{infector}}$  is the breathing rate of the infector (m<sup>3</sup>/s);  $q$  is the quantum generation rate (quanta/s);  $\varphi$  is the factor of infectious virus removal.

With the quantum concentration at the target position, the quanta inhaled by a susceptible at the target position over a given exposure period is calculated by Equation 3. With the inhaled quanta, the airborne infection risk of a susceptible at the target position over that exposure period is estimated based on Poisson distribution (Equation 4). The pathogens are discrete matters and distribute in a medium randomly following Poisson distribution [14, 18, 20, 29]. The airborne infection risk is the probability of that susceptible to be infected because of the inhaled airborne pathogens. The dilution-based airborne infection risk proposed is obtained as Equation 5 by combining Equations 2-4.

$$N_{\text{quantum}} = \int_0^T p_{\text{susceptible}} C_{\text{quantum}}(t) dt \quad (3)$$

$$P_D = 1 - e^{-N_{\text{quantum}}} \quad (4)$$

$$P_D = 1 - e^{-\int_0^T \frac{\varphi p_{\text{susceptible}} q}{p_{\text{infector}} D(t)} dt} \quad (5)$$

Where  $C_{\text{quantum}}(t)$  and  $D(t)$  are the quantum concentration (quanta/m<sup>3</sup>) and dilution ratio at the target position at time  $t$  during a given exposure period of  $T$  respectively;  $N_{\text{quantum}}$  is the inhaled quanta by a susceptible at the target position during the given exposure period;  $P_D$  is the airborne infection risk at the target position during the given exposure period estimated by the dilution-based estimation method proposed;  $p_{\text{susceptible}}$  is the breathing rate of the susceptible (m<sup>3</sup>/s), which can be different from that of the infector because the infector and susceptible have different health conditions and might have different activity levels [25].

Since the method proposed employs the concept of the quantum, it has the merit as the Wells-Riley model of implicitly considering the biological complexities of the

infectivity, infectious source strength, biological decay of pathogens, *etc.*, which makes the evaluation of the airborne infection risk by the method proposed simple and quick [14]. Moreover, compared with the Wells-Riley model, the method proposed has two advantages. First, the method proposed can estimate the airborne infection risk for any target position during any exposure period (Equation 5), *i.e.*, the method proposed evaluates the airborne infection risk for both spatial and temporal resolutions. Second, the method proposed is more convenient for practical applications. The Wells-Riley model (Equation 6) requires knowing the numbers of infectors, but the method proposed does not. The information on the numbers of infectors is not always available, particularly when asymptomatic infectors present. It was reported that the asymptomatic infectors were responsible for 79% COVID-19 infections in Wuhan [4, 30]. Besides, the Wells-Riley model (Equation 6) requires the input of the ventilation rate which is inconvenient to measure in practice [18]. For example, Wu et al. [31] measured on-site tracer gas concentration in a residential building, and approximated the ventilation rate from the measured tracer gas concentration for the Wells-Riley model to evaluate the airborne infection risk. The approximation of the ventilation rate from the tracer gas concentration increases the evaluation complexity and decreases the evaluation reliability. In contrast, the dilution ratio can be conveniently and reliably obtained from the tracer gas concentration (Equation 1) for the method proposed to evaluate the airborne infection risk, which will be further demonstrated in Section 5.

$$P_{WR} = 1 - e^{-\frac{Ipqt}{Q}} \quad (6)$$

Where  $I$  is the number of infectors;  $P_{WR}$  is the airborne infection risk estimated by the Wells-Riley model;  $p$  is the breathing rate of a typical person ( $\text{m}^3/\text{s}$ );  $Q$  is the ventilation rate ( $\text{m}^3/\text{s}$ );  $t$  is the time length of the exposure period (s).

### 3. Benchmark with Wells-Riley model under well-mixed and steady condition

As introduced in Section 1, the Wells-Riley model has been well recognized to provide a reliable evaluation of the airborne infection risk under the well-mixed and steady condition. Since the method proposed evaluates the airborne infection risk for both spatial and temporal resolutions, the well-mixed and steady condition is one of the special cases. When the method proposed applies to the well-mixed and steady

condition, it should produce identical or similar results to those from the Wells-Riley model. This is proofed as follows. According to the mass conservation law, the variation of contaminants in the space is the generated contaminants in the space minus the contaminants removed from the space by ventilation, which is described by Equation 7 when contaminants are well mixed in the space air [20, 31]. When the contaminants refer to the exhaled air by the infectors (Equation 8) and the contaminants in the ventilation air supply is zero (clean air), the contaminant concentration in the exhaled air is unity and the dilution ratio is the reciprocal of the contaminant concentration in the space air (Equation 9). For the steady condition, the variation of the contaminant concentration in the space air is zero (Equation 10). From Equations 8-10, the dilution ratio under the well-mixed and steady condition is obtained as the function of the ventilation rate, numbers of infectors, and breathing rate of infectors (Equation 11), implying that the dilution ratio implicitly takes into account the ventilation rate, numbers of infectors, and breathing rate of infectors, which makes the implementation of the method proposed convenient in practice as discussed in Section 2. Combing Equations 5 and 11, the method proposed for the well-mixed and steady condition is obtained as Equation 12. In Equation 12, the breathing rate by the susceptible can be the same as that of a typical person and the factor of infectious virus removal can be unity as assumed by the Wells-Riley model. As a result, the proposed model for the well-mixed and steady condition (Equation 12) produces the same airborne infection risk as the Wells-Riley model (Equation 6). This indicates that the method proposed is an expansion of the Wells-Riley model for the evaluation of airborne infection risk with both spatial and temporal resolutions.

$$V \frac{dC_{in}}{dt} = G - Q(C_{in} - C_o) \quad (7)$$

$$G = Ip_{infectior} \quad (8)$$

$$D(t) = \frac{1}{C_{in}(t)} \quad (9)$$

$$0 = G - QC_{in} \quad (10)$$

$$D_{ms} = \frac{Q}{Ip_{infectior}} \quad (11)$$

$$P_{D,ms} = 1 - e^{-\frac{\phi Ip_{susceptible} qt}{Q}} \quad (12)$$

Where  $C_{in}$  and  $C_o$  are the contaminant concentrations in the space air and ventilation air supply respectively (ppm);  $D_{ms}$  is the dilution ratio under the well-mixed and steady condition;  $G$  is the contaminant generation rate in the space ( $m^3/s$ );  $P_{D,ms}$  is the airborne infection risk estimated by the dilution-based estimation method proposed under the well-mixed and steady condition;  $V$  is the volume of the space ( $m^3$ ).

#### 4. Benchmark with rebreathed-fraction model under well-mixed and dynamic condition

The rebreathed-fraction model (Equations 13 and 14) is a modified Wells-Riley model for a reliable evaluation of the airborne infection risk under the well-mixed and transient condition [10, 18-20]. Since the method proposed can evaluate the airborne infection risk for both spatial and temporal resolutions, the well-mixed and transient condition is one of the special cases. When the method proposed applies to the well-mixed and transient condition, it should produce identical or similar results to those from the rebreathed-fraction model. This is proofed as follows. By integrating Equation 7, the transient contaminant concentration in the space air is obtained as Equation 15 [18, 20]. When the contaminants refer to the exhaled air by infectors, the dilution ratio under the well-mixed and transient condition is obtained as Equation 16 from Equations 8, 9 and 15 with the contaminant concentrations in the exhaled air and the ventilation air supply of unity and zero respectively. When the contaminant is  $CO_2$ , the contaminant generation rate in the space is the  $CO_2$  generated by all occupants (Equation 17), and Equation 15 is transferred to be Equation 18. According to the definition of the rebreathed fraction (Equation 14) [18] and Equation 18, the rebreathed fraction is expressed as Equation 19. From Equations 16 and 19, the relationship between the dilution ratio and rebreathed fraction under the well-mixed and transient condition is obtained as Equation 20. With Equation 20 to replace the dilution ratio in Equation 5, the method proposed under the well-mixed and transient condition is expressed as Equation 21. In Equation 21, the breathing rate by the susceptible can be the same as that of a typical person and the factor of infectious virus removal can be unity as assumed by the rebreathed-fraction model. As a result, the proposed model for the well-mixed and transient condition (Equation 21) produces the same airborne infection risk as the rebreathed-fraction model (Equation 13). This indicates that while the

1 rebreathed-fraction model is a limited expansion of the Wells-Riley model with a  
2 temporal resolution of airborne infection risk, the method proposed is a thorough  
3 expansion of the Wells-Riley model with both spatial and temporal resolutions of  
4 airborne infection risk.

$$5 \quad P_{\text{RF}} = 1 - e^{-\int_0^T \frac{Iqf(t)}{n} dt} \quad (13)$$

$$6 \quad f = \frac{C_{\text{in},\text{CO}_2} - C_{\text{o},\text{CO}_2}}{C_{\text{b},\text{CO}_2}} \quad (14)$$

$$7 \quad C_{\text{in}}(t) = C_{\text{o}} + \frac{G}{Q} (1 - e^{-\frac{Qt}{V}}) \quad (15)$$

$$8 \quad \frac{1}{D_{\text{mt}}(t)} = \frac{Ip_{\text{infector}}}{Q} (1 - e^{-\frac{Qt}{V}}) \quad (16)$$

$$9 \quad G_{\text{CO}_2} = npC_{\text{b},\text{CO}_2} \quad (17)$$

$$10 \quad C_{\text{in},\text{CO}_2}(t) = C_{\text{o},\text{CO}_2} + \frac{npC_{\text{b},\text{CO}_2}}{Q} (1 - e^{-\frac{Qt}{V}}) \quad (18)$$

$$11 \quad f(t) = \frac{np}{Q} (1 - e^{-\frac{Qt}{V}}) \quad (19)$$

$$12 \quad D_{\text{mt}}(t) = \frac{np}{If(t)p_{\text{infector}}} \quad (20)$$

$$13 \quad P_{\text{D,mt}} = 1 - e^{-\int_0^T \frac{\varphi Ip_{\text{susceptible}} qf(t)}{np} dt} \quad (21)$$

14 Where  $C_{\text{b},\text{CO}_2}$ ,  $C_{\text{in},\text{CO}_2}$  and  $C_{\text{o},\text{CO}_2}$  are the  $\text{CO}_2$  concentrations in the exhaled air, space  
15 air and ventilation air supply respectively (ppm);  $D_{\text{mt}}$  is the dilution ratio under the well-  
16 mixed and transient condition;  $f$  is the rebreathed fraction;  $n$  is the number of occupants  
17 in the space;  $P_{\text{RF}}$  are  $P_{\text{D,ms}}$  are the airborne infection risks under the well-mixed and  
18 transient condition estimated by the rebreathed-fraction model and the dilution-based  
19 estimation method proposed respectively.

## 20 **5. Demonstration of applicability of method proposed for both spatial and** 21 **temporal resolutions**

22 Experiments are conducted to demonstrate the effectiveness of the method proposed for  
23 the evaluation of airborne infection risk for both spatial and temporal resolutions. The  
24 environmental chamber, with dimensions of 8.8 m (length)  $\times$  6.1 m (width)  $\times$  2.4 m  
25 (height), is configured as a mock hospital ward with multiple beds (Figure 1). The ward

1 is served with displacement ventilation that the conditioned air is supplied near the floor  
2 level (S1-S14) (with the supply air temperature around 20°C and supply airflow rate  
3 around 12 ACH) and exhausted from the ceiling (E1- E3). Displacement ventilation has  
4 an airflow pattern with high contaminant removal efficiency at the breathing level [13].  
5 SF<sub>6</sub> (released from the mouth of the infector in Figure 1) is used as the tracer gas to  
6 represent the airborne contaminants [31-33]. Three target positions (L1-L3) with the  
7 standing susceptible occupants are concerned, and the tracer gas concentrations at the  
8 three target positions are measured at the breathing level (*i.e.*, at the height of 1.5 m  
9 above the floor). INNOVA 1412i is used to measure the concentration of SF<sub>6</sub> with a  
10 measurement accuracy of 0.06 ppm.

11 Figure 2 shows that the tracer gas distribution is both spatially and temporally non-  
12 uniform. The concentration of the tracer gas generally increases first and then tends to  
13 be steady, but fluctuates slightly due to the randomness induced by air turbulence (Sze  
14 and Chao 2010). The tracer gas concentration at the target position of L1 is higher than  
15 those at the other two target positions because it is the closest to the infector. From the  
16 tracer gas distribution, the dilution ratio is calculated (Equation 1). The dose rate of the  
17 tracer gas is 2 ml/s and the breathing rate of the resting infector is 0.49 m<sup>3</sup>/h [25],  
18 resulting in a contaminant concentration of the source around 14,700 ppm for the  
19 calculation of the dilution ratio (Equation 1). Figure 3 shows that the dilution ratio also  
20 has spatial and temporal resolutions, varying from around 2000 to 14,000. The dilution  
21 ratios at the three target positions decrease first and then tend to be steady, and the  
22 dilution ratio of the target position (L1) closest to the infector is the smallest.

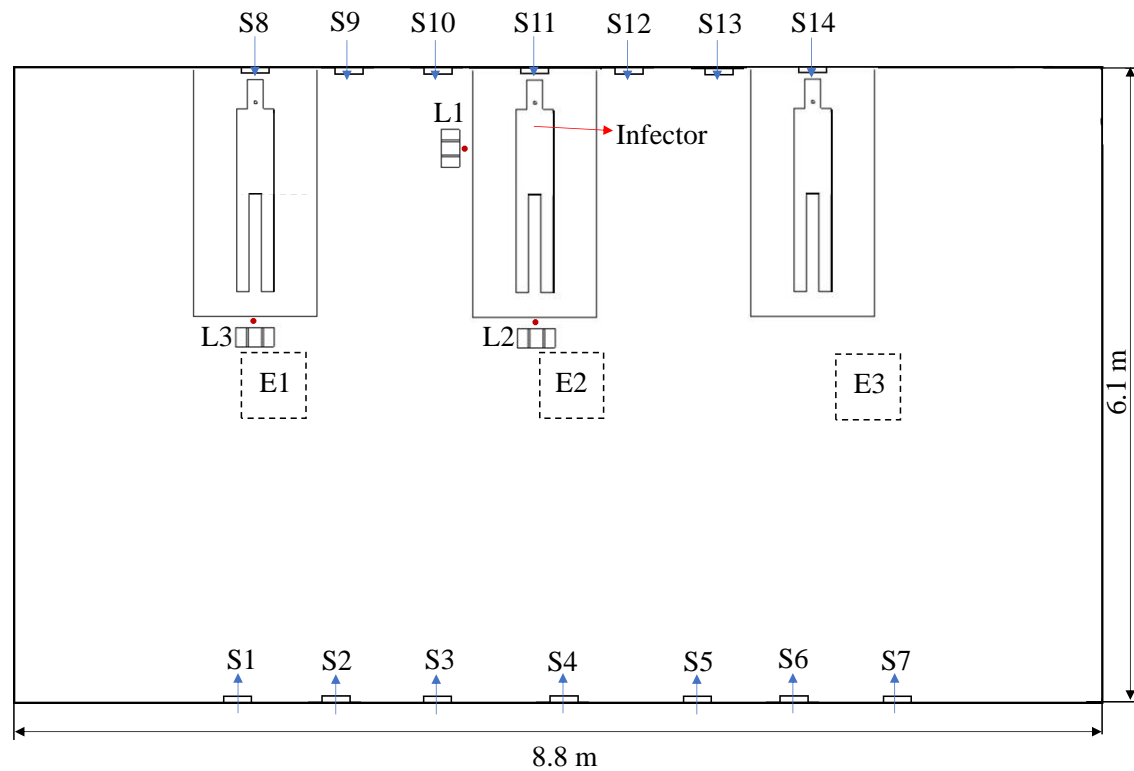

Note: S1-S14 are the air supply terminals; E1- E3 are the exits; L1-L3 are sampling points at the height of 1.5 m above the floor.

**Fig.1.** Experimental setup of mock hospital ward with multiple beds served with displacement ventilation.

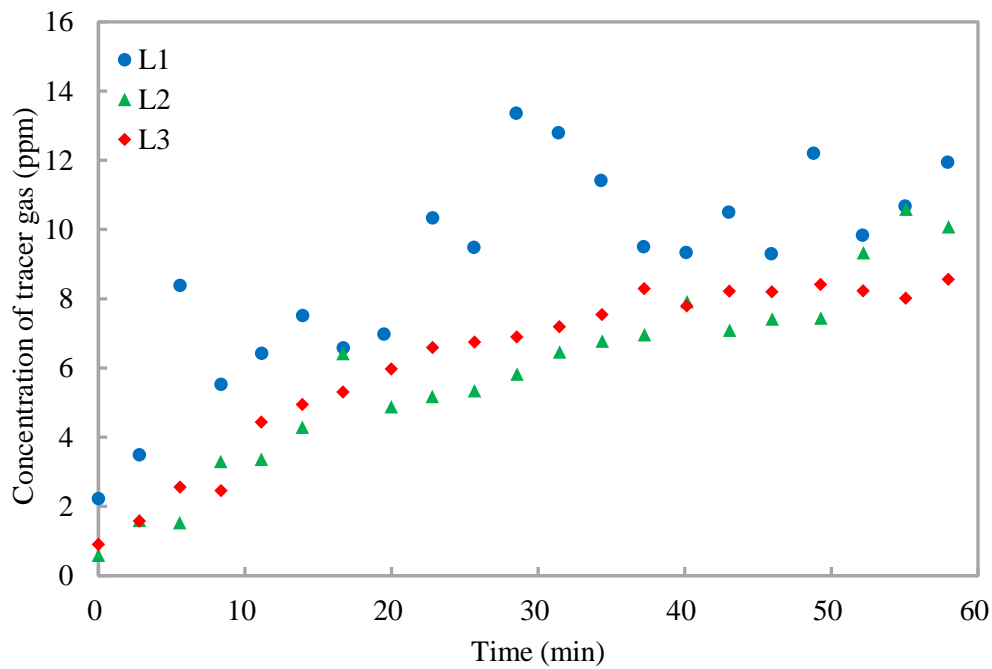

**Fig.2.** Variations of tracer gas concentrations at different target positions with time.

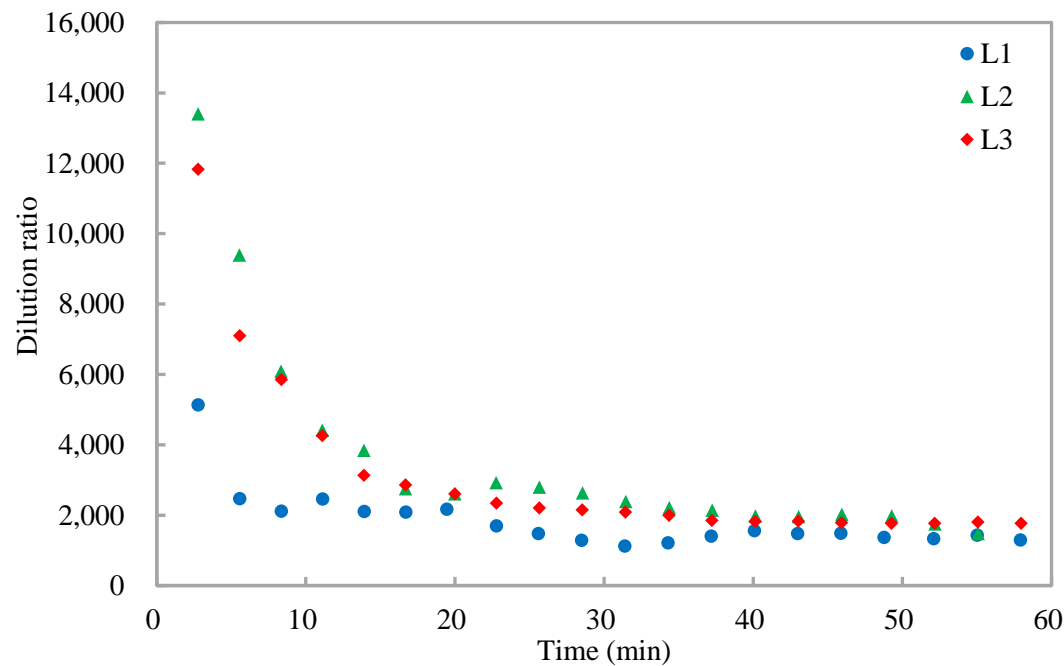

**Fig.3.** Variations of dilution ratio at different target positions with time.

With the dilution ratio, the airborne infection risks at the three target positions are calculated (Equation 5) (Figures 4 and 5). The quantum generation rate of a COVID-19 infector is assigned to be 142 quanta/h and the breathing rate of a standing susceptible is  $0.54 \text{ m}^3/\text{h}$  [25]. Two scenarios are considered, one with no masks and the other with surgical masks for both the infector and susceptible. Under Scenario 1 with no masks (*i.e.*, with the factor of infectious virus removal of unity) (Figure 4), the airborne infection risks at the three target positions increase with time, and the airborne infection risks at the target positions over the given exposure period (one hour) of L1-L3 are 9.5%, 5.9%, and 6.7% respectively. The large variations of the airborne infection risk indicate that the airborne infection risk should be evaluated both spatially and temporally. Otherwise, the infection airborne risk could be overestimated (*e.g.*, for the target position far away from the source, such as L2 and L3) or underestimated (*e.g.*, for the target position close to the source, such as L1). When surgical masks with an efficiency of 75% [12] are used by both the infector and susceptible under Scenario 2 (Figure 5), the factor of infectious virus removal is 0.0625 (*i.e.*,  $(1-0.75)^2$ ), and the airborne infection risks of all the three target positions are largely reduced to be below 0.7%, indicating that the surgical masks are effective in reducing the cross infections [4]. These results demonstrate the effectiveness of the method proposed in evaluating

1 the airborne infection risk both spatially and temporally.

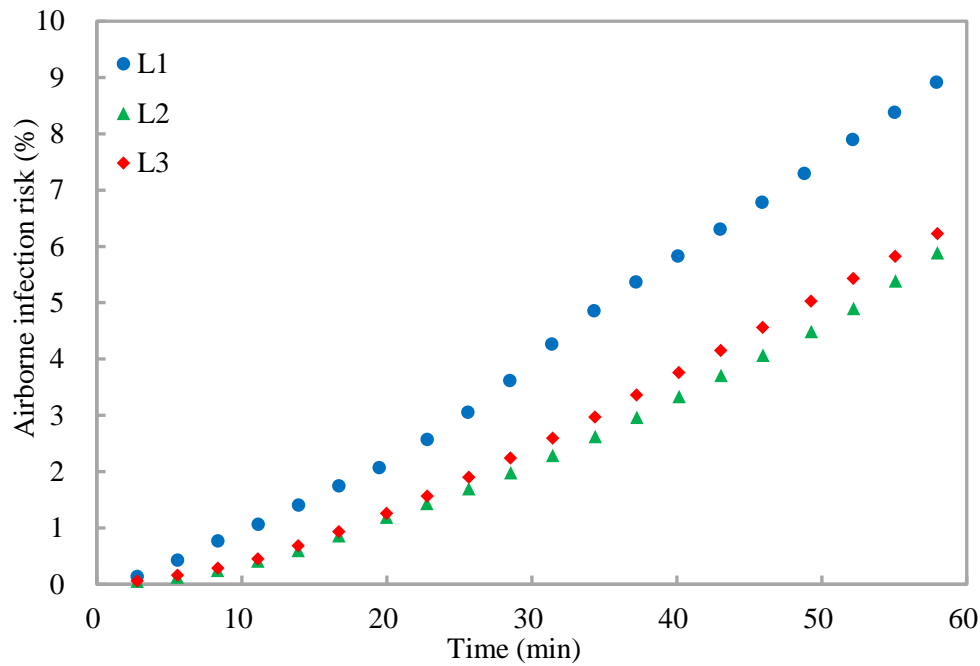

2  
3 *Noted: The infector and susceptible do not wear masks.*

4 **Fig.4.** Variations of airborne infection risks at different target positions with time.

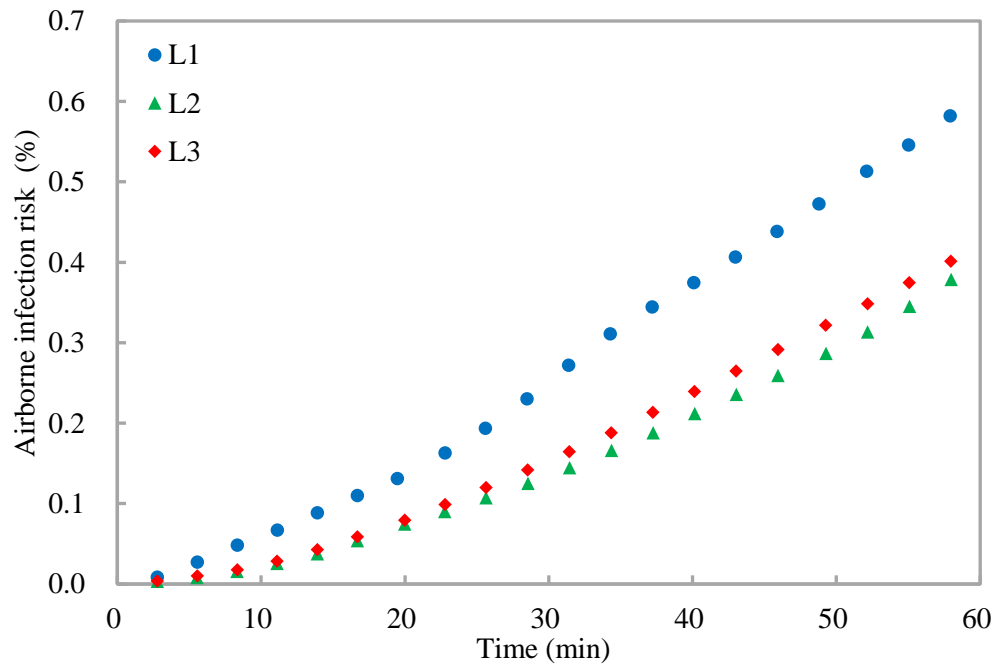

5  
6 *Noted: The infector and susceptible wear surgical masks.*

7 **Fig.5.** Variations of airborne infection risks at different target positions with time.

8

## 6. Conclusions

This study proposes an evaluation method for the airborne infection risk based on the concept of dilution. The dilution ratio is used to calculate the inhaled quanta of airborne pathogens with which the airborne infection risk is calculated according to Poisson distribution. The method proposed is benchmarked by the Wells-Riley model under the well-mixed and steady condition, and by a modified Wells-Riley model (*i.e.*, rebreathed-fraction model) under the well-mixed and transient condition, which indicates that the method proposed is a thorough expansion of the Wells-Riley model. Compared with the Wells-Riley model, the method proposed has two advantages of 1) evaluation of airborne infection risk for both spatial and temporal resolutions, and 2) convenience in practical applications. Experiments in a mock hospital ward with multiple beds served with displacement ventilation demonstrate that the method proposed effectively evaluates airborne infection risk both spatially and temporally. The method proposed contributes to the reliable evaluation of airborne infection risk and developing effective interventions for reducing cross infections of infectious respiratory diseases (*e.g.*, COVID-19).

## Acknowledgement

The work described in this paper is supported by the National Natural Science Foundation of China (Project No. 51878585). The help of Ms. Yalin Lu in the experiments is highly appreciated.

## Competing interests

Authors declare no competing interests.

## References

- [1] Aliabadi AA, Rogak SN, Bartlett KH, Green SI. 2011. Preventing airborne disease transmission: review of methods for ventilation design in health care facilities. *Advances in Preventive Medicine*, 2011.

- 1 [2] Li Y, Leung GM, Tang JW, Yang X, Chao CY, Lin JZ, Lu JW, Nielsen PV, Niu J,  
2 Qian H, Sleigh AC, Su HJJ, Sundell J, Wong TW, Yuen PL. 2007. Role of  
3 ventilation in airborne transmission of infectious agents in the built environment-a  
4 multidisciplinary systematic review. *Indoor Air*, 17(1), 2-18.
- 5 [3] Nicas M, Nazaroff WW, Hubbard A. 2005. Toward understanding the risk of  
6 secondary airborne infection: emission of respirable pathogens. *Journal of*  
7 *Occupational and Environmental Hygiene*, 2(3), 143-154.
- 8 [4] Prather KA, Wang CC, Schooley RT. 2020. Reducing transmission of SARS-CoV-  
9 2. *Science*, 10.1126/science.abc6197
- 10 [5] Stadnytskyi V, Bax CE, Bax A, Anfinrud P. 2020. The airborne lifetime of small  
11 speech droplets and their potential importance in SARS-CoV-2 transmission.  
12 *Proceedings of the National Academy of Sciences*, 117(22), 11875-11877.
- 13 [6] Yu IT, Li Y, Wong TW, Tam W, Chan AT, Lee JH, Leung DY, Ho T. 2004. Evidence  
14 of airborne transmission of the severe acute respiratory syndrome virus. *New*  
15 *England Journal of Medicine*, 350(17), 1731-1739.
- 16 [7] Liu Y, Ning Z, Chen Y, Guo M, Liu Y, Gali NK, Sun L, Duan Y, Cai J, Westerdahl  
17 D, Liu X, Xu K, Ho K, Kan H, Fu Q, Lan K. 2020. Aerodynamic analysis of SARS-  
18 CoV-2 in two Wuhan hospitals. *Nature*, 582(7813), 557-560.
- 19 [8] Allen JG, Marr LC. 2020. Recognizing and controlling airborne transmission of  
20 SARS-CoV-2 in indoor environments. *Indoor Air*, 30(4), 557.
- 21 [9] Morawska L, Cao J. 2020. Airborne transmission of SARS-CoV-2: The world  
22 should face the reality. *Environment International*, 139, 105730.
- 23 [10] Ai ZT, Melikov AK. 2018. Airborne spread of expiratory droplet nuclei between  
24 the occupants of indoor environments: A review. *Indoor Air*, 28(4), 500-524.
- 25 [11] ASHRAE, 2020. Position Document on Airborne Infectious Diseases,  
26 [https://www.ashrae.org/file%20library/about/position%20documents/airborne-](https://www.ashrae.org/file%20library/about/position%20documents/airborne-infectiousdiseases)  
27 [infectiousdiseases.](https://www.ashrae.org/file%20library/about/position%20documents/airborne-infectiousdiseases)
- 28 [12] Zhang J. 2020. Integrating IAQ control strategies to reduce the risk of

1 asymptomatic SARS CoV-2 infections in classrooms and open plan offices.  
2 Science and Technology for the Built Environment, 26, 1013–1018.

3 [13]Yang B, Melikov AK, Kabanshi A, Zhang C, Bauman FS, Cao G, Awbi H, Wigo  
4 H, Niu J, Cheong KWD, Tham KW, Sandberg M, Nielsen PV, Kosonen R, Yao R,  
5 Kato S, Sekhar SC, Schiavon S, Karimipناه T, Li X, Lin Z. 2019. A review of  
6 advanced air distribution methods-theory, practice, limitations and solutions.  
7 Energy and Buildings, 109359.

8 [14]Sze To GN, Chao CYH. 2010. Review and comparison between the Wells–Riley  
9 and dose - response approaches to risk assessment of infectious respiratory  
10 diseases. Indoor Air, 20(1), 2-16.

11 [15]Qian H, Zheng X. 2018. Ventilation control for airborne transmission of human  
12 exhaled bio-aerosols in buildings. Journal of Thoracic Disease, 10, S2295.

13 [16]Asadi S, Bouvier N, Wexler AS, Ristenpart WD. 2020. The coronavirus pandemic  
14 and aerosols: Does COVID-19 transmit via expiratory particles?. Aerosol Science  
15 and Technology, 54(6), 635-638.

16 [17]Cheng Y, Zhang S, Huan C, Oladokun MO, Lin Z. 2019. Optimization on fresh  
17 outdoor air ratio of air conditioning system with stratum ventilation for both  
18 targeted indoor air quality and maximal energy saving. Building and Environment,  
19 147, 11-22.

20 [18]Rudnick SN, Milton DK. 2003. Risk of indoor airborne infection transmission  
21 estimated from carbon dioxide concentration. Indoor Air, 13(3), 237-245.

22 [19]Hella J, Morrow C, Mhimbira F, Ginsberg S, Chitnis N, Gagneux S, Mutayoba B,  
23 Wood R, Fenner L. 2017. Tuberculosis transmission in public locations in Tanzania:  
24 A novel approach to studying airborne disease transmission. Journal of Infection,  
25 75(3), 191-197.

26 [20]Issarow CM, Mulder N, Wood R. 2015. Modelling the risk of airborne infectious  
27 disease using exhaled air. Journal of Theoretical Biology, 372, 100-106.

28 [21]Qian H, Li Y, Nielsen PV, Huang X. 2009. Spatial distribution of infection risk of

1 SARS transmission in a hospital ward. *Building and Environment*, 44(8), 1651-  
2 1658.

3 [22]Zhu S, Srebric J, Spengler JD, Demokritou P. 2012. An advanced numerical model  
4 for the assessment of airborne transmission of influenza in bus microenvironments.  
5 *Building and Environment*, 47, 67-75.

6 [23]Wells WF. 1955. *Airborne Contagion and Air Hygiene*, Cambridge MA,  
7 Cambridge University Press. 117–122.

8 [24]Andrews JR, Morrow C, Wood R. 2013. Modeling the role of public transportation  
9 in sustaining tuberculosis transmission in South Africa. *American Journal of*  
10 *Epidemiology*, 177(6), 556-561.

11 [25]Buonanno G, Stabile L, Morawska L. 2020. Estimation of airborne viral emission:  
12 quanta emission rate of SARS-CoV-2 for infection risk assessment. *Environment*  
13 *International*, 141, 105794.

14 [26]Leung NH, Chu DK, Shiu EY, Chan KH, McDevitt JJ, Hau BJ, Yen H, Li Y, Ip D,  
15 Malik Peiris J, Seto WH, Leung G, Milton D, Cowling B. 2020. Respiratory virus  
16 shedding in exhaled breath and efficacy of face masks. *Nature Medicine*, 26(5),  
17 676-680.

18 [27]Zhai J. 2020. Facial mask: A necessity to beat COVID-19. *Building and*  
19 *Environment*, 175, 106827.

20 [28]Zhao B, Liu Y, Chen C. 2020. Air purifiers: A supplementary measure to remove  
21 airborne SARS-CoV-2. *Building and Environment*, 177, 106918.

22 [29]Riley EC, Murphy G, Riley RL. 1978. Airborne spread of measles in a suburban  
23 elementary school. *American Journal of Epidemiology*, 107(5), 421-432.

24 [30]Li R, Pei S, Chen B, Song Y, Zhang T, Yang W, Shaman J. 2020. Substantial  
25 undocumented infection facilitates the rapid dissemination of novel coronavirus  
26 (SARS-CoV-2). *Science*, 368(6490), 489-493.

27 [31]Wu Y, Tung TC, Niu JL. 2016. On-site measurement of tracer gas transmission  
28 between horizontal adjacent flats in residential building and cross-infection risk  
29 assessment. *Building and Environment*, 99, 13-21.

30 [32]Ai Z, Mak CM, Gao N, Niu J. 2020. Tracer gas is a suitable surrogate of exhaled

- 1        droplet nuclei for studying airborne transmission in the built environment. *Building*
- 2        *Simulation*, 13, 489-496.
- 3        [33]Liu L, Li Y, Nielsen PV, Wei J, Jensen RL. 2017. Short-range airborne transmission
- 4        of expiratory droplets between two people. *Indoor Air*, 27, 452–462.
